# Supplementary material for: Assessment of the Effects of Chitosan, Chitooligosaccharides and Their Derivatives on Lemna minor
Source: MDPI journal article supplement (doi:10.3390/molecules27186123), 2022-09-19
Supplement: s1 [file s1]

## Supplementary materials

**Table S1.** Results of Dunn's posthoc test for D-glucosamine. Statistically significant data ( $p < 0.05$ ) are written in bold

|          | 5 mg/L | 50 mg/L      | 500 mg/L     |
|----------|--------|--------------|--------------|
| 5 mg/L   |        | <b>0.034</b> | <b>0.034</b> |
| 50 mg/L  |        |              | 1            |
| 500 mg/L |        |              |              |

**Table S2.** Results of Tukey's posthoc test for N-acetyl-D-glucosamine (above diagonal) and for chitobiose dihydrochloride (below diagonal). Statistically significant data ( $p < 0.05$ ) are written in bold

|          | 5 mg/L | 50 mg/L      | 500 mg/L |
|----------|--------|--------------|----------|
| 5 mg/L   |        | 0.596        | 0.706    |
| 50 mg/L  | 0.354  |              | 0.979    |
| 500 mg/L | 0.081  | <b>0.013</b> |          |

**Table S3.** Results of Dunn's posthoc test for N-carboxymethyl chitosan. Statistically significant data ( $p < 0.05$ ) are written in bold

|           | 50 mg/L | 250 mg/L | 500 mg/L | 5000 mg/L    |
|-----------|---------|----------|----------|--------------|
| 50 mg/L   |         | 0.364    | 0.427    | <b>0.009</b> |
| 250 mg/L  |         |          | 0.910    | 0.089        |
| 500 mg/L  |         |          |          | 0.070        |
| 5000 mg/L |         |          |          |              |

**Table S4.** Results of Dunn's posthoc test for Low MW chitosan (above diagonal) and of Tukey's posthoc test for Medium MW chitosan (below diagonal). Statistically significant data ( $p < 0.05$ ) are written in bold

|           | 50 mg/L      | 500 mg/L     | 5000 mg/L    |
|-----------|--------------|--------------|--------------|
| 50 mg/L   |              | 0.285        | <b>0.033</b> |
| 500 mg/L  | <b>0.002</b> |              | 0.285        |
| 5000 mg/L | <b>0.001</b> | <b>0.007</b> |              |

**Table S5.** Results of Tukey's posthoc test for High MW chitosan (above diagonal) and for chitosan with  $\approx 50\%$  DaD (below diagonal). Statistically significant data ( $p < 0.05$ ) are written in bold

|           | 50 mg/L      | 500 mg/L | 5000 mg/L |
|-----------|--------------|----------|-----------|
| 50 mg/L   |              | 0        | 0         |
| 500 mg/L  | <b>0.001</b> |          | 0         |
| 5000 mg/L | <b>0.001</b> | 0.386    |           |

**Table S6.** Molecular weight (MW) and deacetylation degree (DaD) of chitoooligosaccharide (CO), CO derivative and chitosan samples

| Tested samples                   | Sample ID | MW (kDa) | DaD (%) |
|----------------------------------|-----------|----------|---------|
| D-glucosamine hydrochloride      | G         | 0,216    | 0       |
| N-acetyl-D-glucosamine           | NAG       | 0,221    | 100     |
| chitobiose dihydrochloride       | 2G        | 0,413    | 0       |
| N-carboxymethyl chitosan         | CMChi     | 0,544    | 90      |
| Low MW chitosan                  | ChiS      | 198      | 81      |
| Medium MW chitosan               | ChiM      | 307      | 84      |
| High MW chitosan                 | ChiL      | 604      | 83      |
| Chitosan with $\approx 50\%$ DaD | Chi50     | 278      | 48      |

**Table S7.** Results of Pearson Linear r correlation test for EC<sub>50</sub> values and molecular weight of various sample combinations. Statistically significant data ( $p < 0.05$ ) are written in bold

| Correlation of EC <sub>50</sub> and MW of  | <i>p</i> value | Correlation statistic |
|--------------------------------------------|----------------|-----------------------|
| G, NAG, 2G, CMChi, ChiS, ChiM, ChiL, Chi50 | 0.996          | -0.002                |
| G, NAG, 2G                                 | 0.930          | -0.110                |
| G, NAG, 2G, CMChi                          | 0.422          | 0.578                 |
| G, 2G, CMChi                               | 0.241          | 0.929                 |
| ChiS, ChiM, ChiL, Chi50                    | 0.327          | 0.673                 |
| CMChi, ChiS, ChiM, ChiL, Chi50             | 0.489          | -0.413                |
| G, 2G, ChiS, ChiM, ChiL                    | 0.062          | 0.858                 |
| 2G, ChiS, ChiM, ChiL                       | <b>0.011</b>   | 0.988                 |
| Chi50, ChiS, CMChi                         | <b>0.019</b>   | -0.999                |

**Table S8.** Results of Pearson Linear r correlation test for EC<sub>50</sub> values and deacetylation degree of various sample combinations. Statistically significant data ( $p < 0.05$ ) are written in bold

| Correlation of EC <sub>50</sub> and MW of  | <i>p</i> value | Correlation statistic |
|--------------------------------------------|----------------|-----------------------|
| G, NAG, 2G, CMChi, ChiS, ChiM, ChiL, Chi50 | 0.536          | 0.258                 |
| G, NAG, 2G                                 | 0.247          | 0.926                 |
| G, NAG, 2G, CMChi                          | 0.596          | 0.404                 |
| ChiS, ChiM, ChiL, Chi50                    | 0.100          | -0.900                |
| CMChi, ChiS, ChiM, ChiL, Chi50             | 0.141          | -0.754                |
| G, ChiS, ChiM, ChiL, NAG                   | 0.176          | 0.713                 |
| 2G, ChiS, NAG                              | 0.088          | 0.990                 |
| ChiS, ChiM, ChiL, CMChi                    | 0.051          | -0.949                |
| ChiS, ChiL, CMChi                          | <b>0.044</b>   | -0.997                |

**Table S9.** Results of Pearson Linear r correlation test for Wiener index, molecular weight (MW), log P, log S, IGC<sub>50</sub>, LC<sub>50</sub>FM and LC<sub>50</sub>DM for the analyzed chitooligosaccharides (unprotonated structures) and their derivatives. Correlation statistics are shown below the diagonal and *p* values are shown above the diagonal, with statistically significant data ( $p < 0.05$ ) being written in bold

|                     | Wiener Index | MW       | logP     | logS     | IGC <sub>50</sub> | LC <sub>50</sub> FM | LC <sub>50</sub> DM |
|---------------------|--------------|----------|----------|----------|-------------------|---------------------|---------------------|
| Wiener Index        |              | 1.20E-09 | 0.001    | 0.016    | 0.005             | 0.002               | 0.213               |
| MW                  | 0.919        |          | 1.30E-05 | 1.22E-05 | 0.003             | 0.371               | 0.031               |
| logP                | -0.781       | -0.844   |          | 4.08E-07 | 0.973             | 0.089               | 0.145               |
| logS                | 0.735        | 0.845    | -0.856   |          | 0.433             | 0.159               | 0.043               |
| IGC <sub>50</sub>   | -0.481       | -0.504   | -0.006   | -0.144   |                   | 0.662               | 2.89E-12            |
| LC <sub>50</sub> FM | -0.526       | -0.662   | 0.305    | -0.684   | 0.646             |                     | 0.094               |
| LC <sub>50</sub> DM | -0.677       | -0.722   | 0.264    | -0.359   | 0.946             | 0.697               |                     |

**Table S10.** Results of Pearson Linear  $r$  correlation test for Wiener index, molecular weight (MW), log P, log S, IGC<sub>50</sub>, LC<sub>50</sub>FM and LC<sub>50</sub>DM for the analyzed chitooligosaccharides (protonated structures). Correlation statistics are shown below the diagonal and  $p$  values are shown above the diagonal, with statistically significant data ( $p < 0.05$ ) being written in bold

|                     | Wiener Index | MW              | logP            | logS            | IGC <sub>50</sub> | LC <sub>50</sub> FM | LC <sub>50</sub> DM |
|---------------------|--------------|-----------------|-----------------|-----------------|-------------------|---------------------|---------------------|
| Wiener Index        |              | <b>1.62E-10</b> | <b>0.002</b>    | 0.112           | <b>0.006</b>      | <b>0.002</b>        | 0.205               |
| MW                  | 0.917        |                 | <b>1.82E-05</b> | <b>8.95E-05</b> | <b>0.004</b>      | 0.287               | <b>0.031</b>        |
| logP                | -0.771       | -0.840          |                 | <b>1.01E-05</b> | 0.909             | 0.084               | 0.155               |
| logS                | 0.693        | 0.821           | -0.847          |                 | 0.560             | 0.153               | 0.069               |
| IGC <sub>50</sub>   | -0.476       | -0.497          | -0.021          | -0.107          |                   | 0.066               | <b>4.48E-12</b>     |
| LC <sub>50</sub> FM | -0.529       | -0.669          | 0.310           | -0.685          | 0.646             |                     | 0.090               |
| LC <sub>50</sub> DM | -0.677       | -0.722          | 0.257           | -0.326          | 0.945             | 0.698               |                     |
